# Supplementary material for: The Effects of Antofine on the Morphological and Physiological Characteristics of Phytophthora capsici
Source: MDPI journal article supplement (doi:10.3390/molecules29091965), 2024-04-25
Supplement: s1 [file s1]

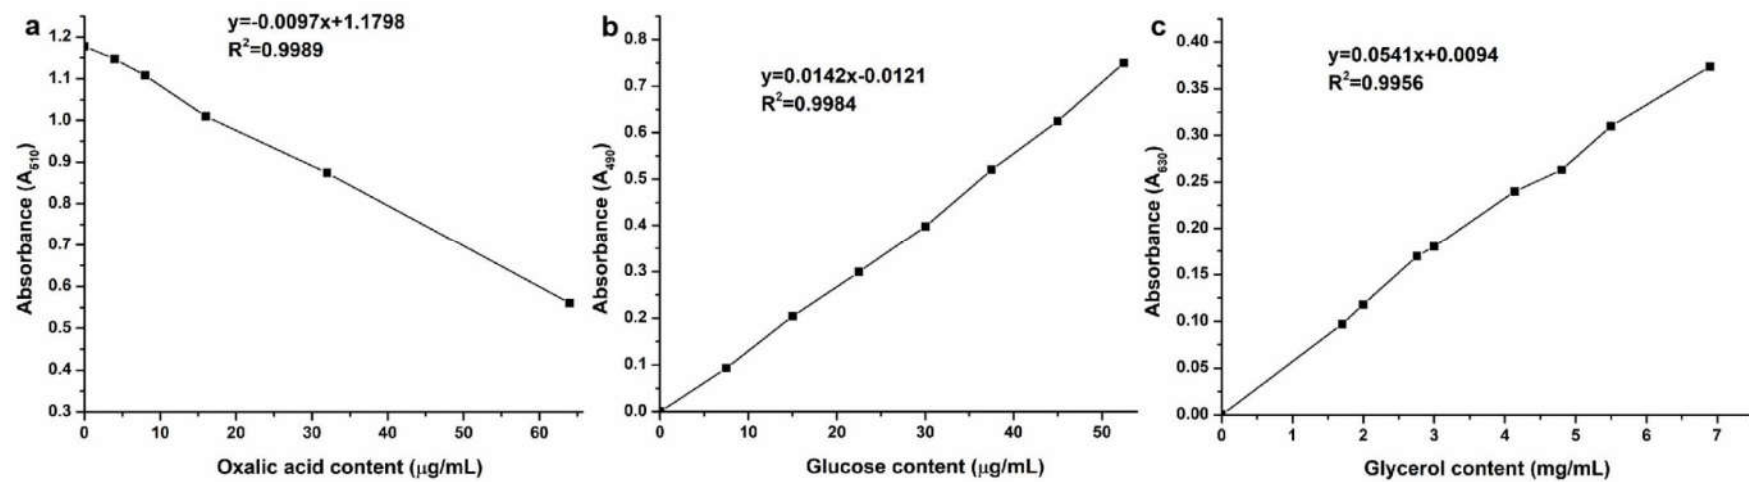

**Figure S1.** Standard curve. (a) Standard curve for determination of oxalate content; (b) standard curve for determination of exopolysaccharide content; (c) standard curve for determination of glycerol content
